# Supplementary material for: Synthesis of a multivalent α-1,2-mannobiose ligand for targeting C-type lectins
Source: Royal Society of Chemistry journal article supplement (doi:10.1039/d4ra06526c), 2024-01-01
Supplement: d4ra06526c1.pdf [file d4ra06526c1.pdf]

## Supplementary Information

### Synthesis of a Multivalent $\alpha$ -1,2-Mannobiose Ligand for Targeting C-type Lectins

Jannis Langer<sup>a,b</sup>, Laura Hartmann<sup>a, b\*</sup>, and Nicole L. Snyder<sup>c\*</sup>

a. Institute for Organic Chemistry and Macromolecular Chemistry, Heinrich Heine University Düsseldorf, Universitätsstraße 1, Düsseldorf 40225, Germany.

b. Institute for Macromolecular Chemistry, University Freiburg, Stefan-Meier-Str. 31, 79104 Freiburg i.Br., Germany

c. Department of Chemistry, Davidson College, Davidson, NC 28035, USA

\* Corresponding authors: Laura Hartmann ([laura.hartmann@makro.uni-freiburg.de](mailto:laura.hartmann@makro.uni-freiburg.de)) and Nicole L. Snyder ([nisnyder@davidson.edu](mailto:nisnyder@davidson.edu))

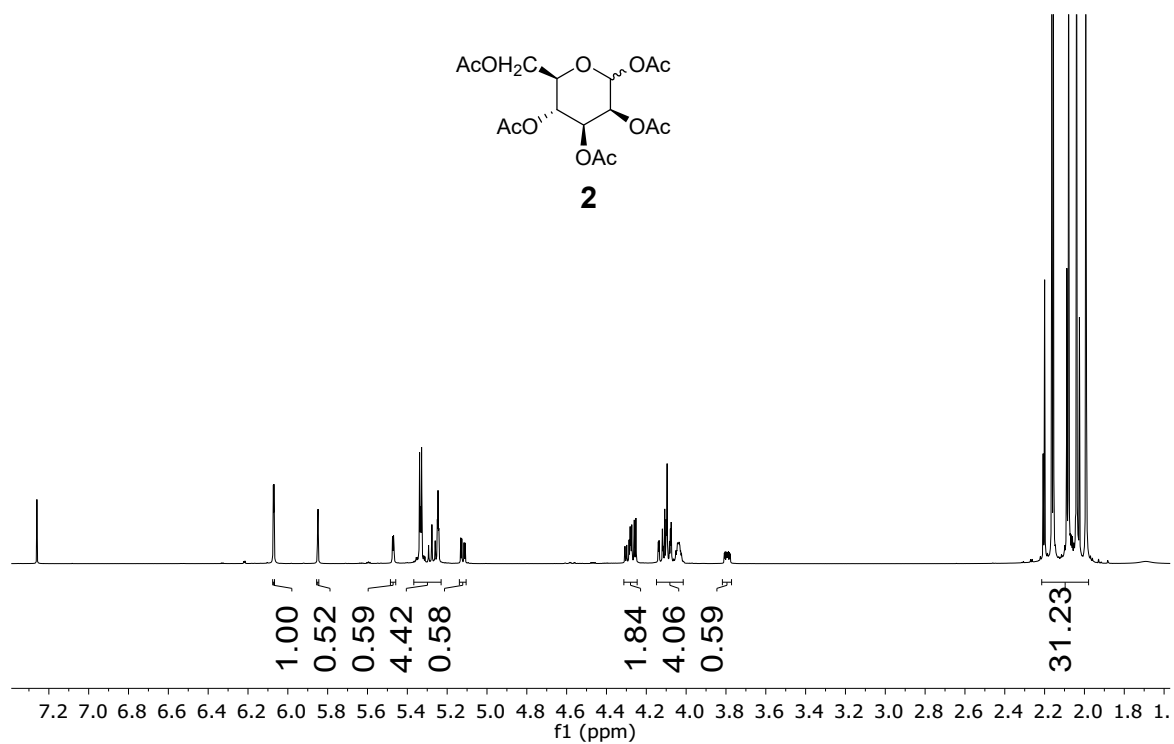

**Figure 1:** <sup>1</sup>H NMR (CDCl<sub>3</sub>, 600MHz) of structure **2**.

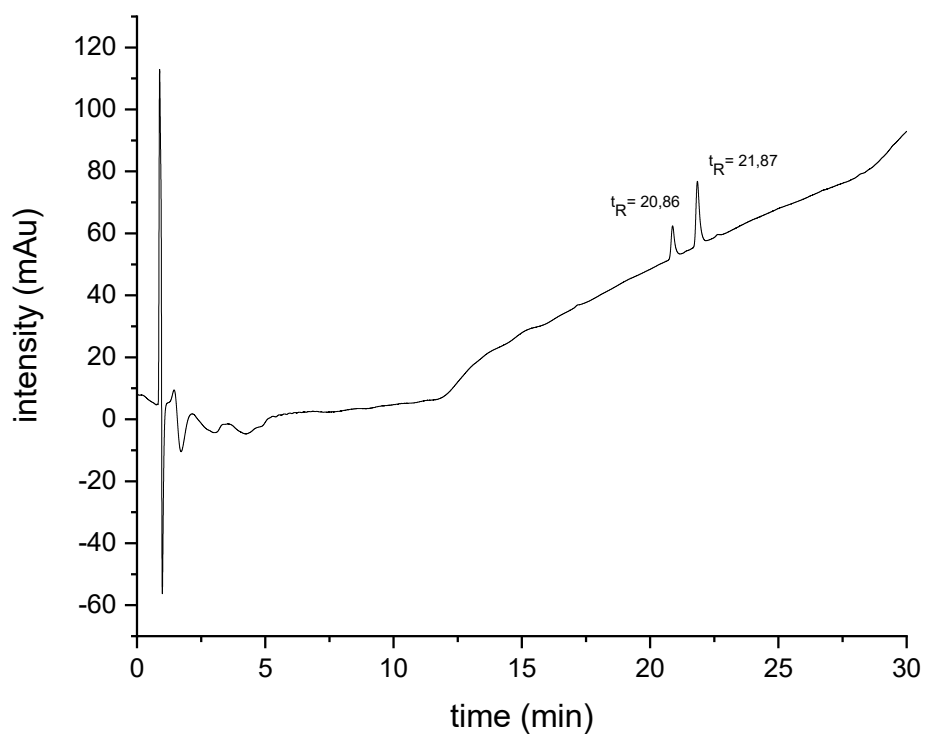

**Figure 2:** RP HPLC chromatogram (linear gradient 0-50 Vol% MeCN in H<sub>2</sub>O in 30 min at 25 °C) of structure **2**.

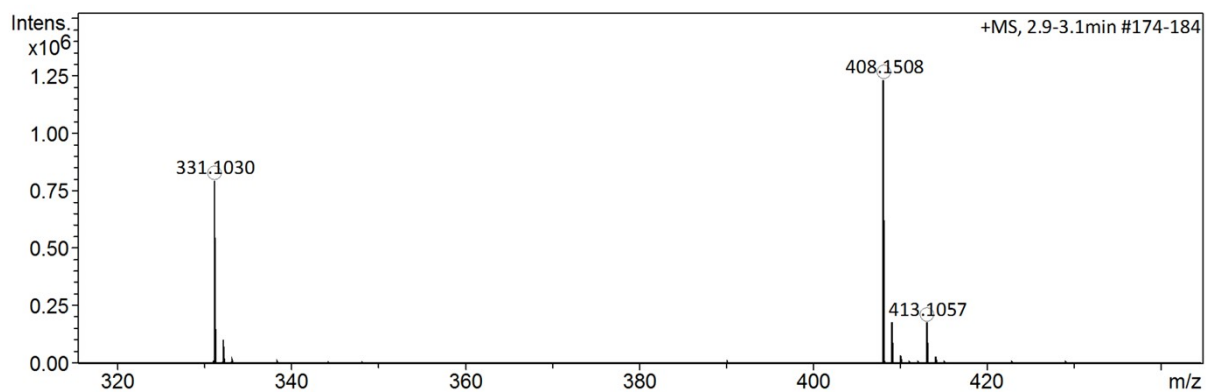

Figure 3: HR MS of structure 2.

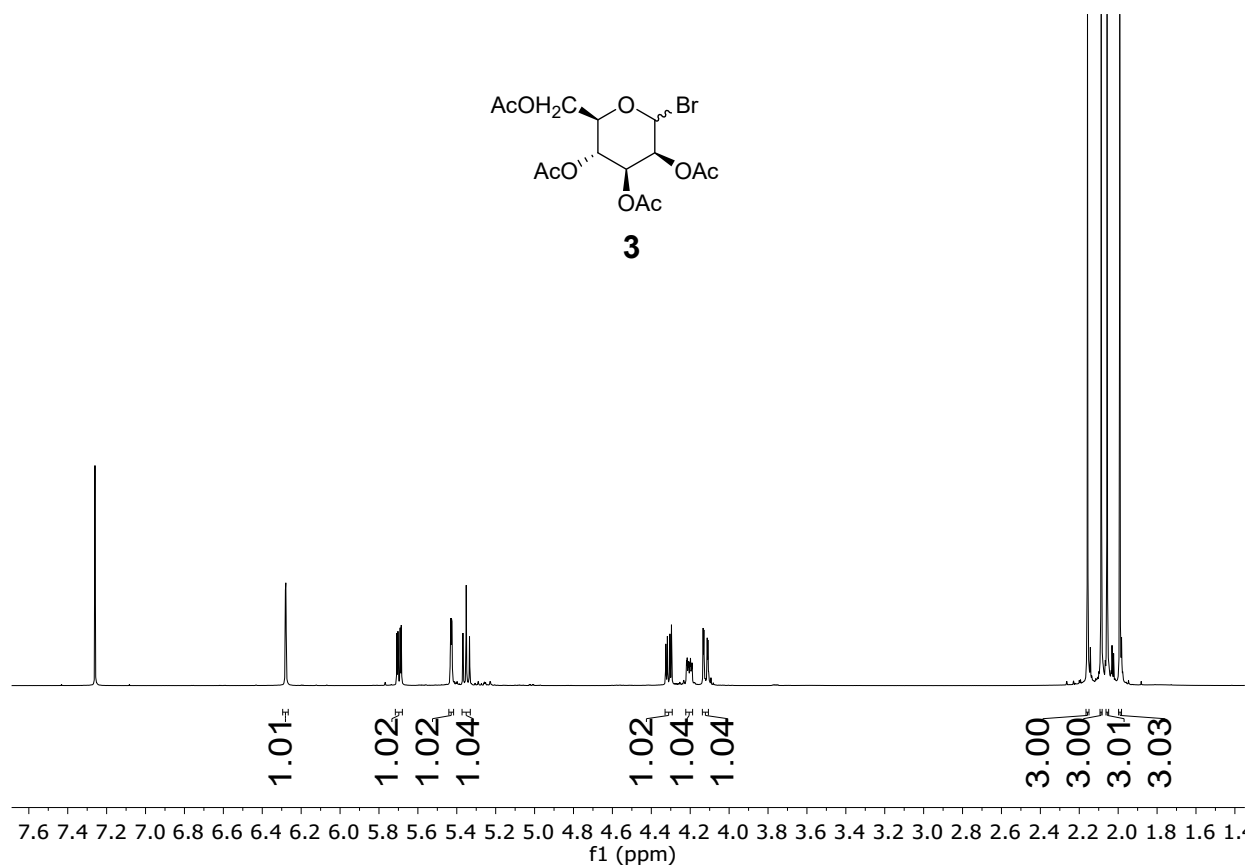

Figure 4: <sup>1</sup>H NMR (CDCl<sub>3</sub>, 600MHz) of structure 3.

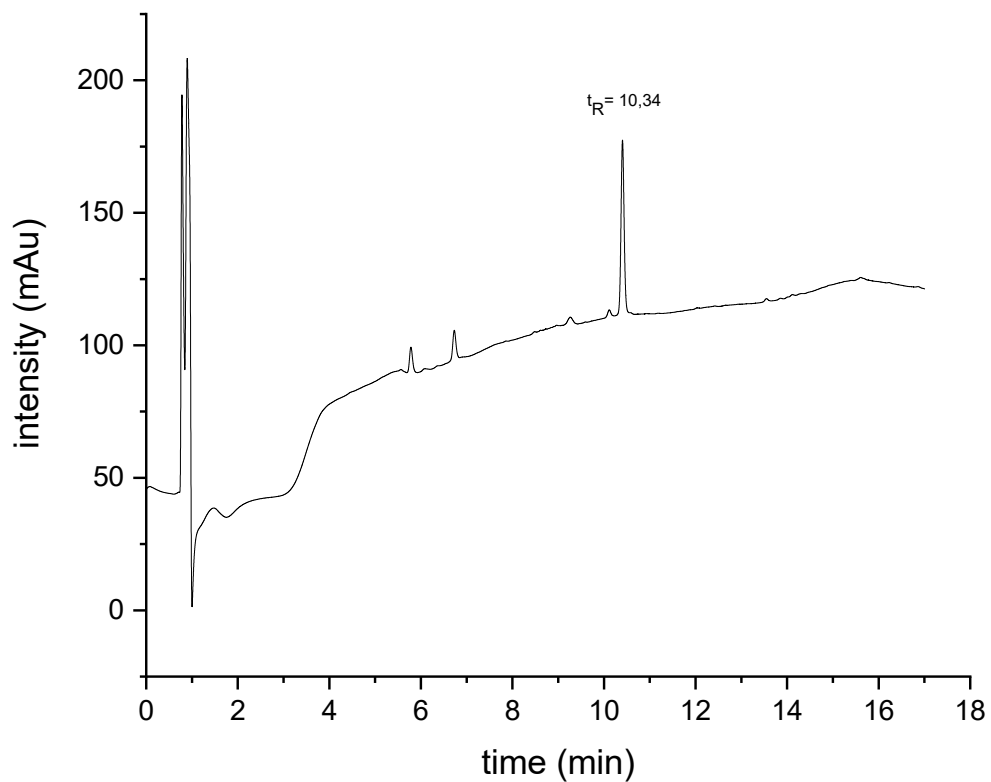

**Figure 5:** RP HPLC chromatogram (linear gradient 0-50 Vol% MeCN in H<sub>2</sub>O in 30 min at 25 °C) of structure 3.

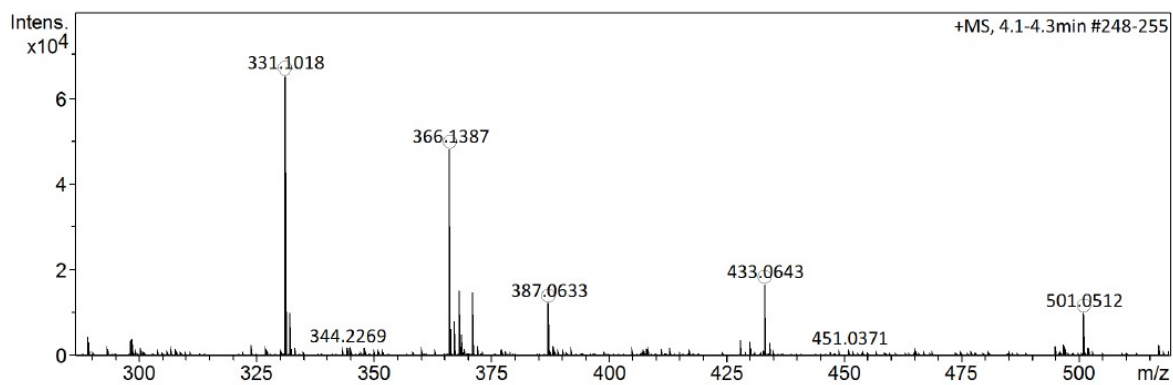

**Figure 6:** HRMS of structure 3.

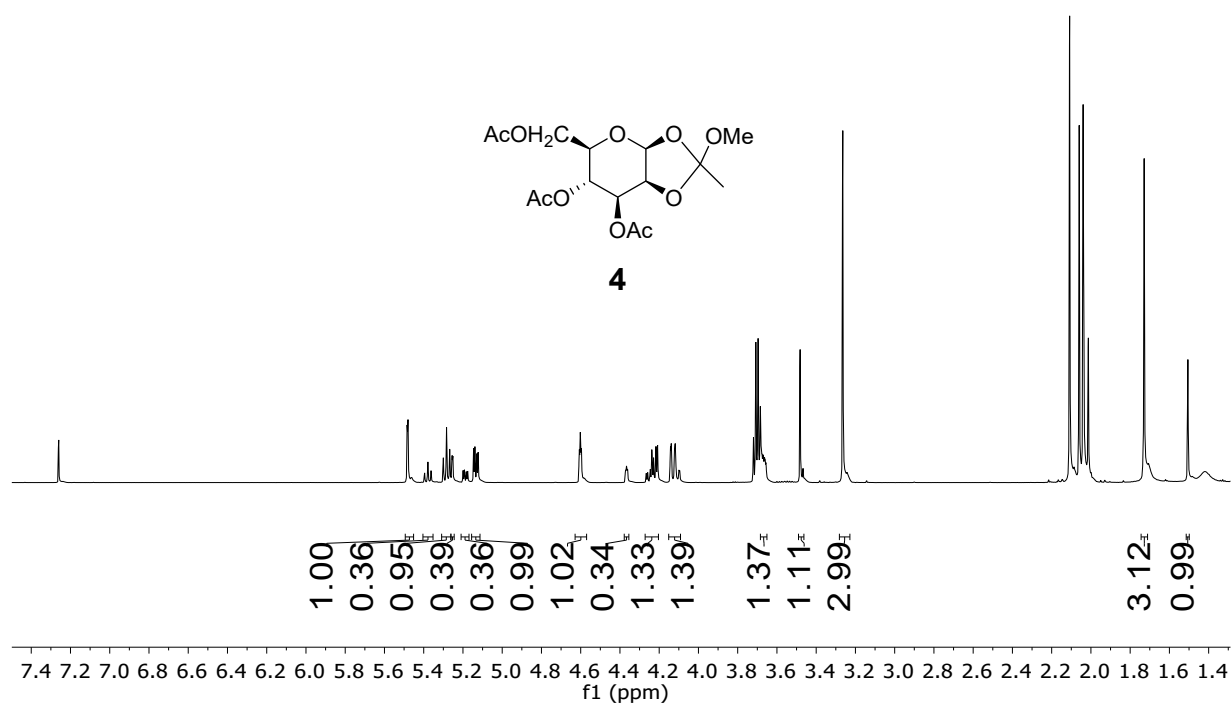

**Figure 7:** <sup>1</sup>H NMR (CDCl<sub>3</sub>, 600MHz) of structure 4.

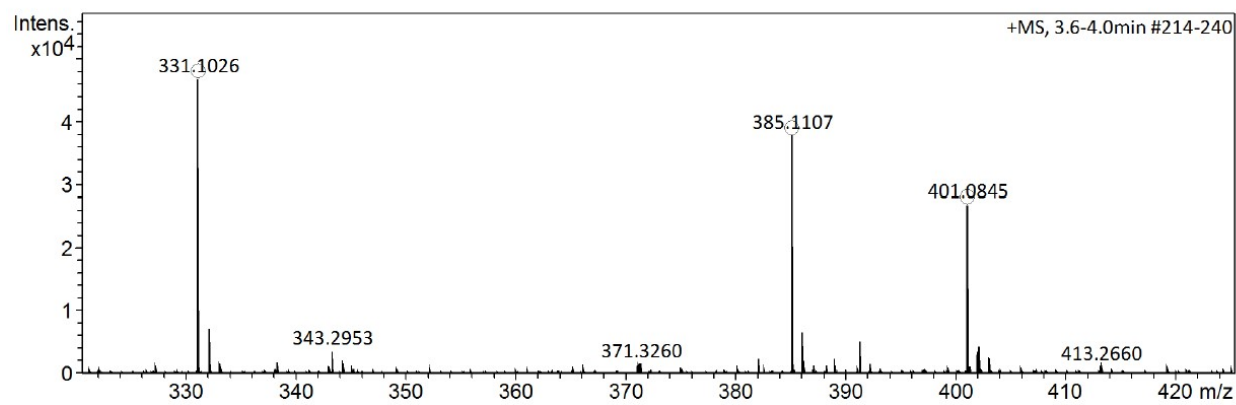

**Figure 8:** HRMS of structure 4.

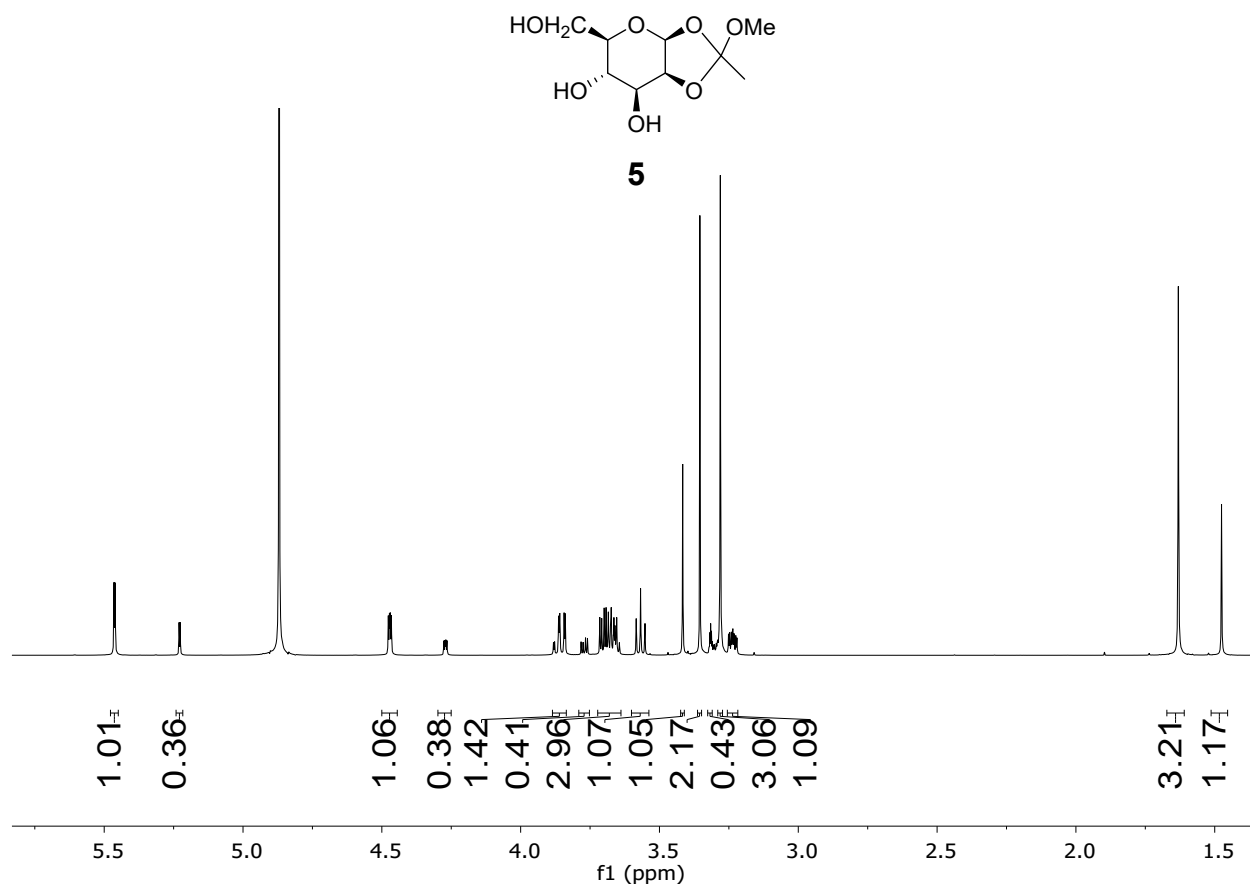

**Figure 9:**  $^1\text{H}$  NMR ( $\text{MeOH-d}_4$ , 600MHz) of structure 5.

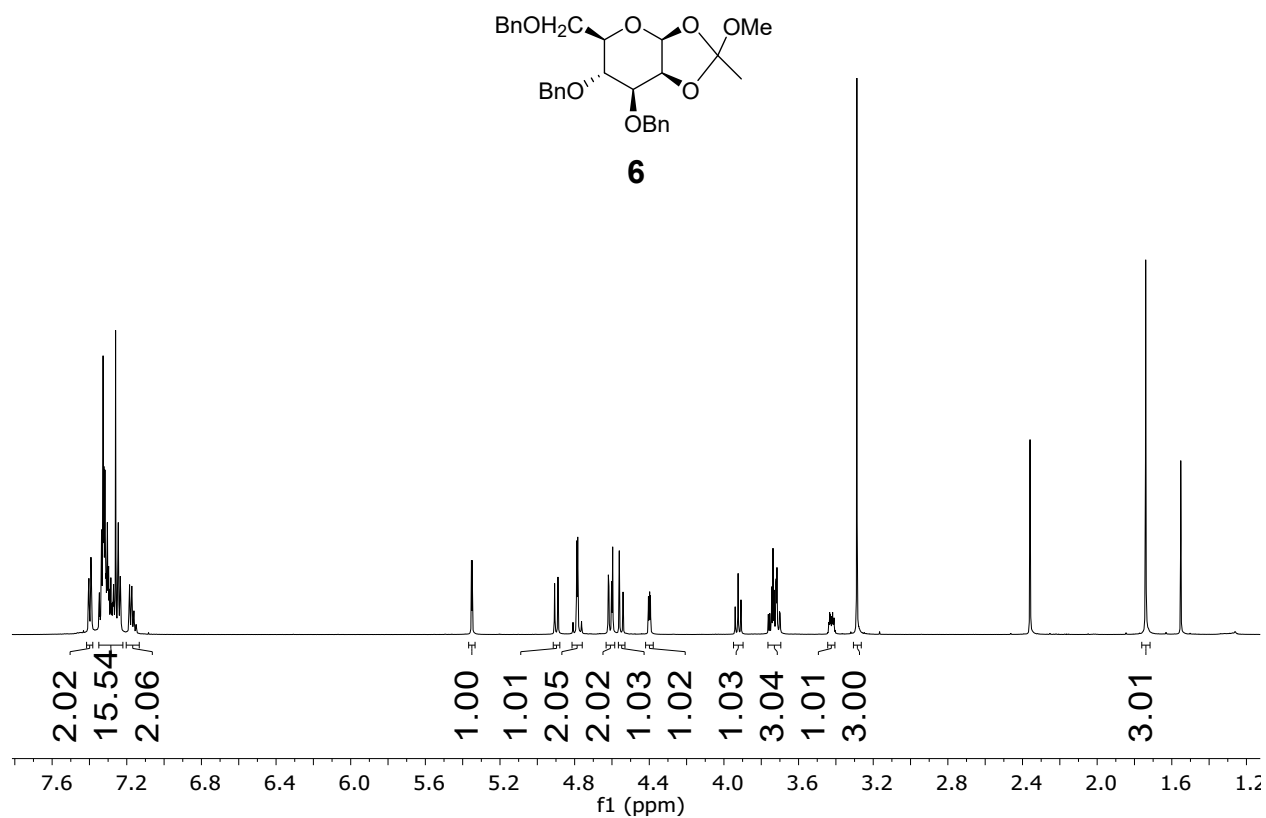

**Figure 10:**  $^1\text{H}$  NMR ( $\text{CDCl}_3$ , 600MHz) of structure **6**.

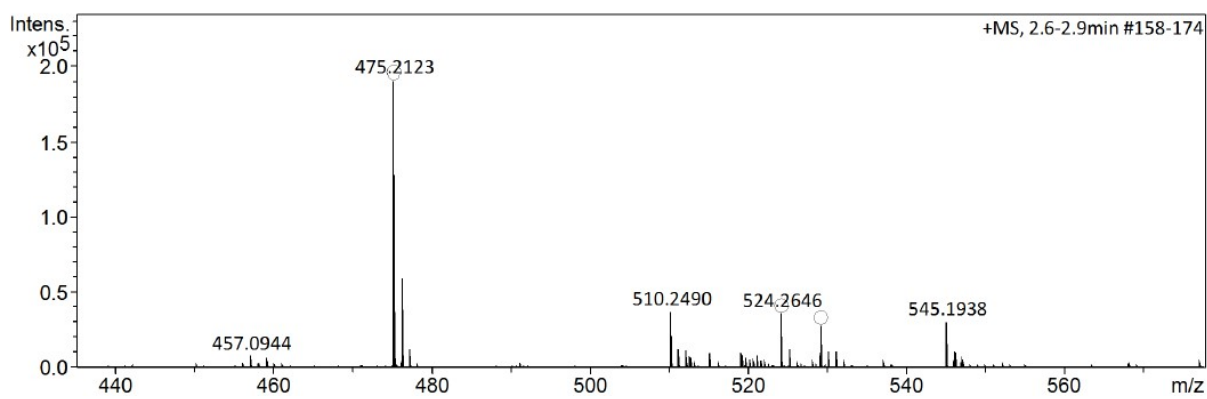

**Figure 11:** HRMS of structure **6**.

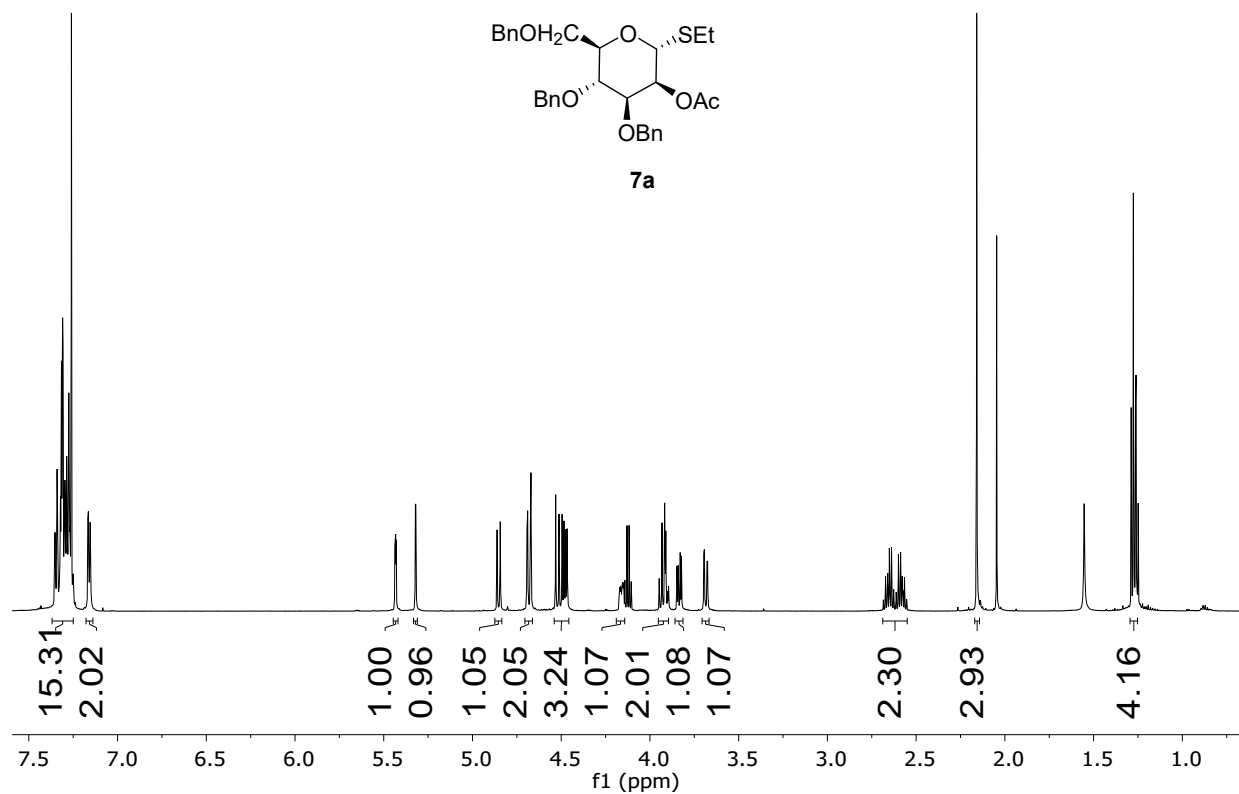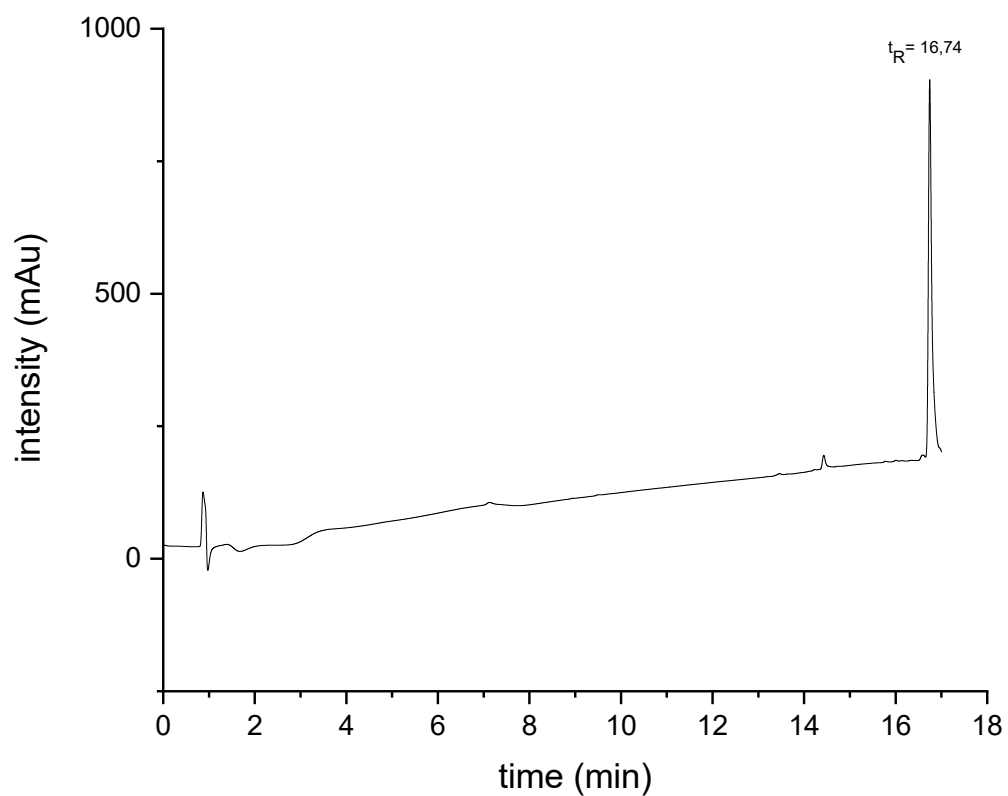



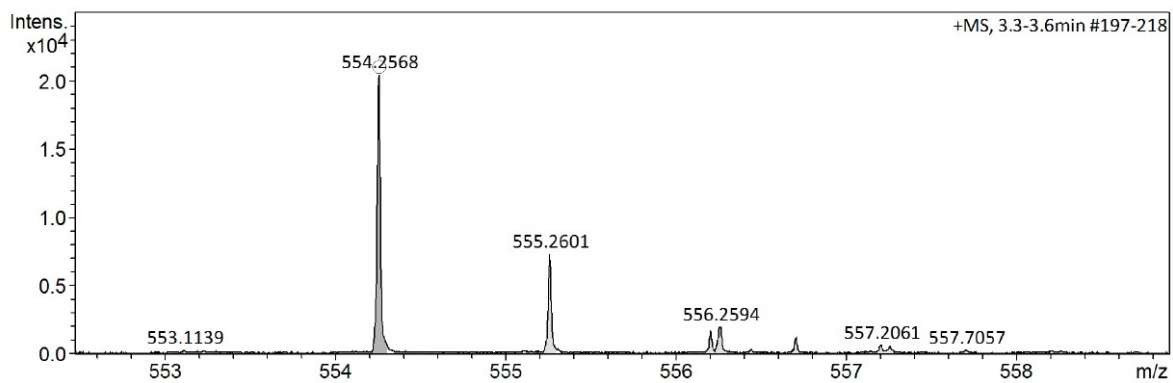

Figure 14: HR MS of structure 7a.

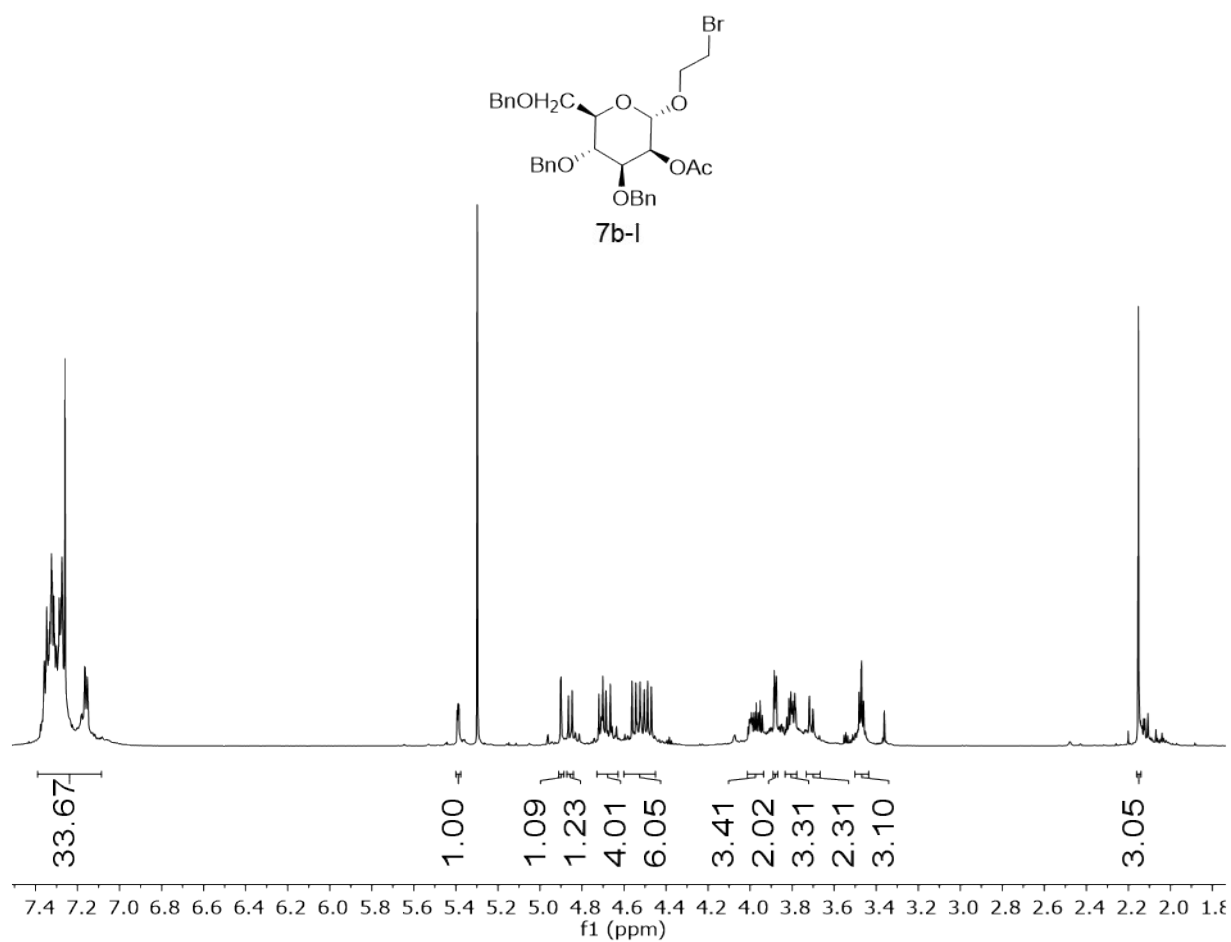

Figure 15: <sup>1</sup>H NMR (CDCl<sub>3</sub>, 600MHz) of structure 7b-I.

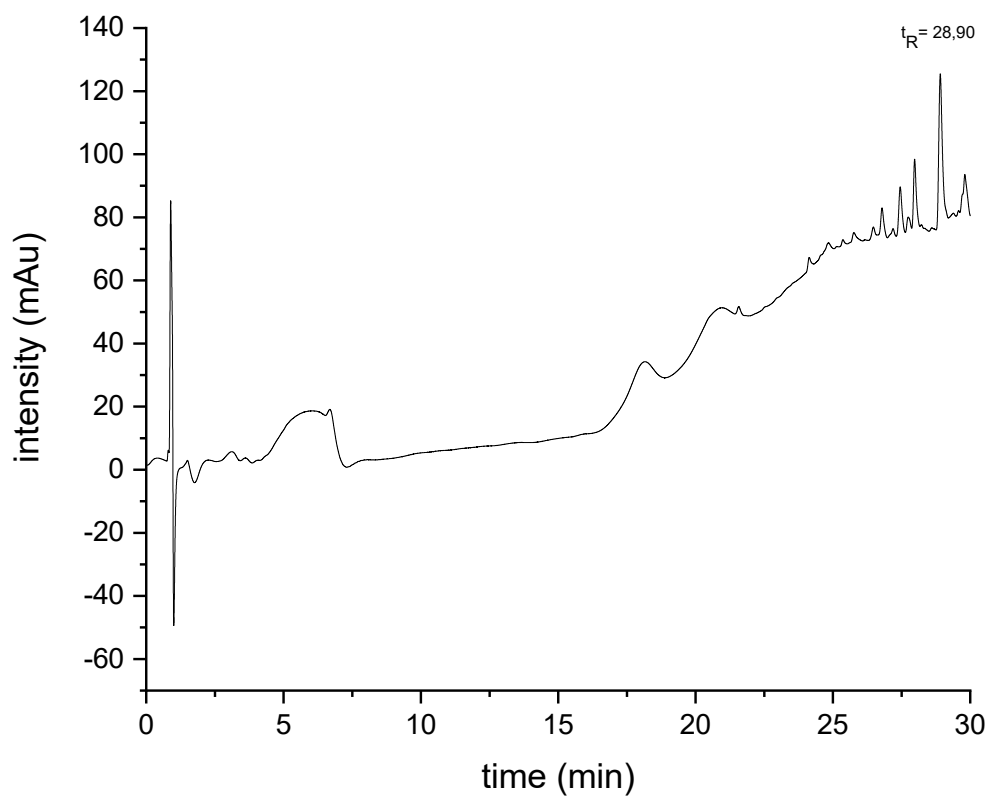

**Figure 16:** RP HPLC chromatogram (linear gradient 0-50 Vol% MeCN in H<sub>2</sub>O in 30 min at 25 °C) of structure **7b-I**.

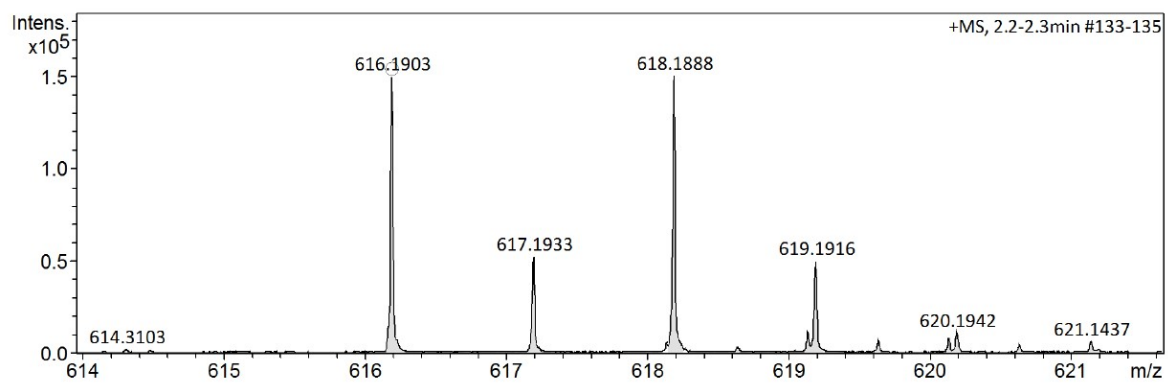

**Figure 17:** HR-MS of structure **7b-I**.

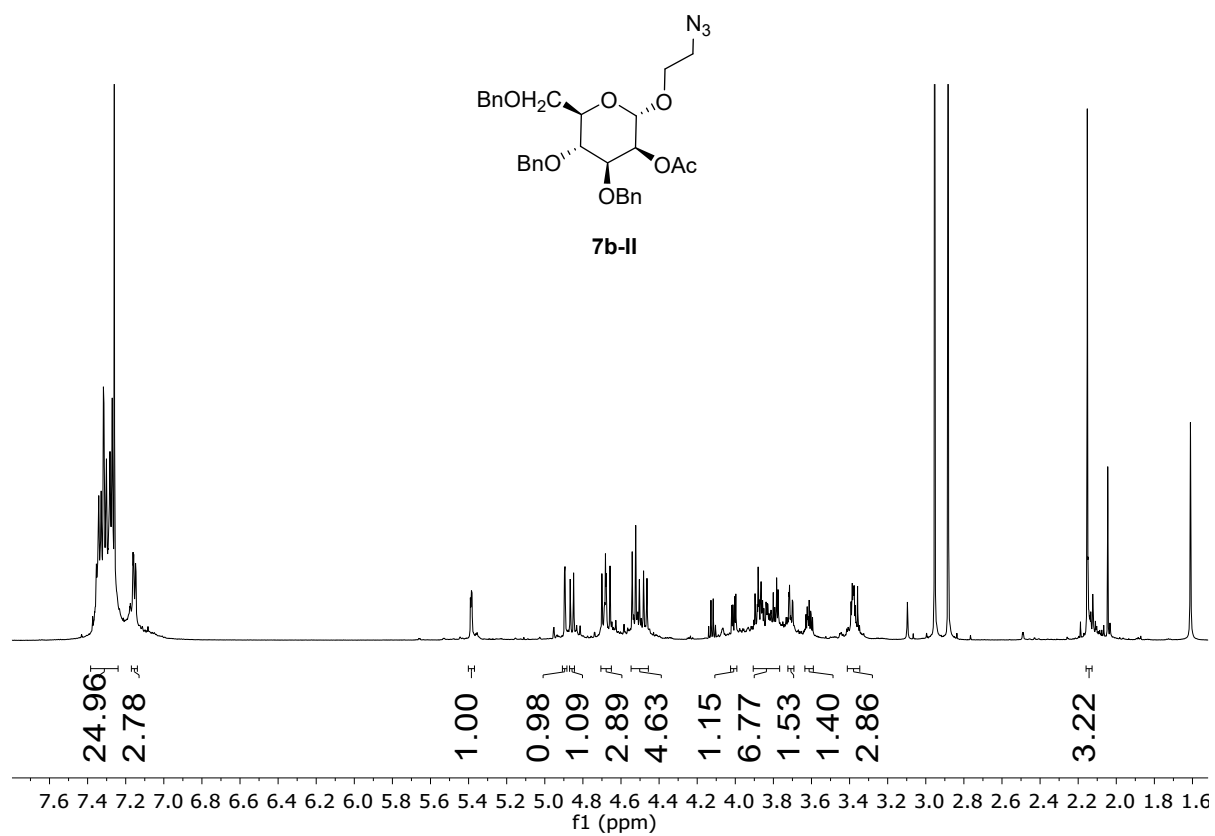

**Figure 18:**  $^1\text{H}$  NMR ( $\text{CDCl}_3$ , 600MHz) of structure **7b-II**.

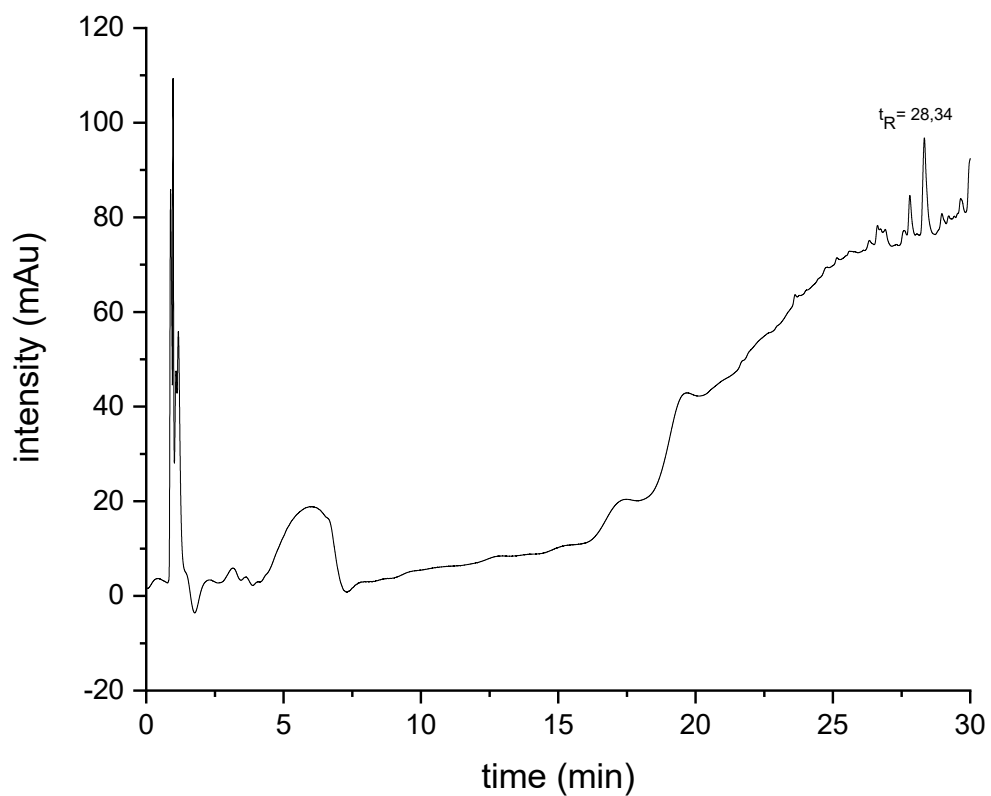

**Figure 19:** RP HPLC chromatogram (linear gradient 0-50 Vol% MeCN in H<sub>2</sub>O in 30 min at 25 °C) of structure **7b-II**.

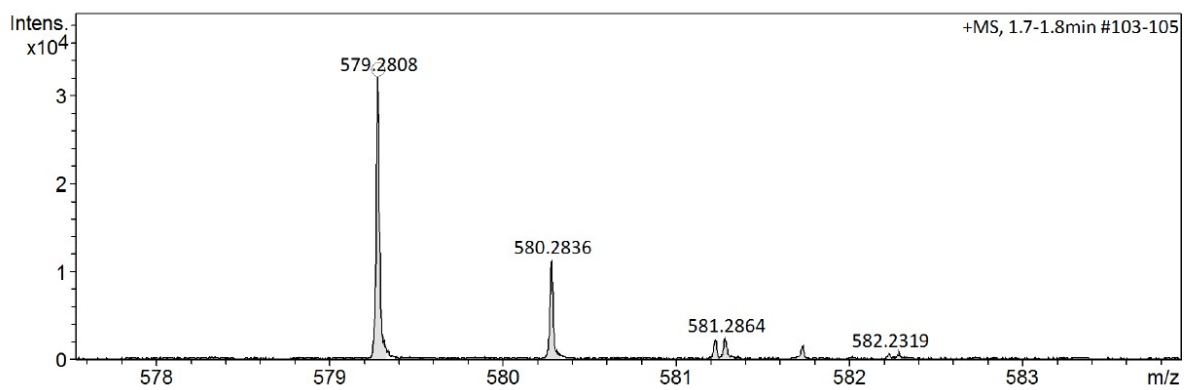

**Figure 20:** HR-MS of structure **7b-II**.

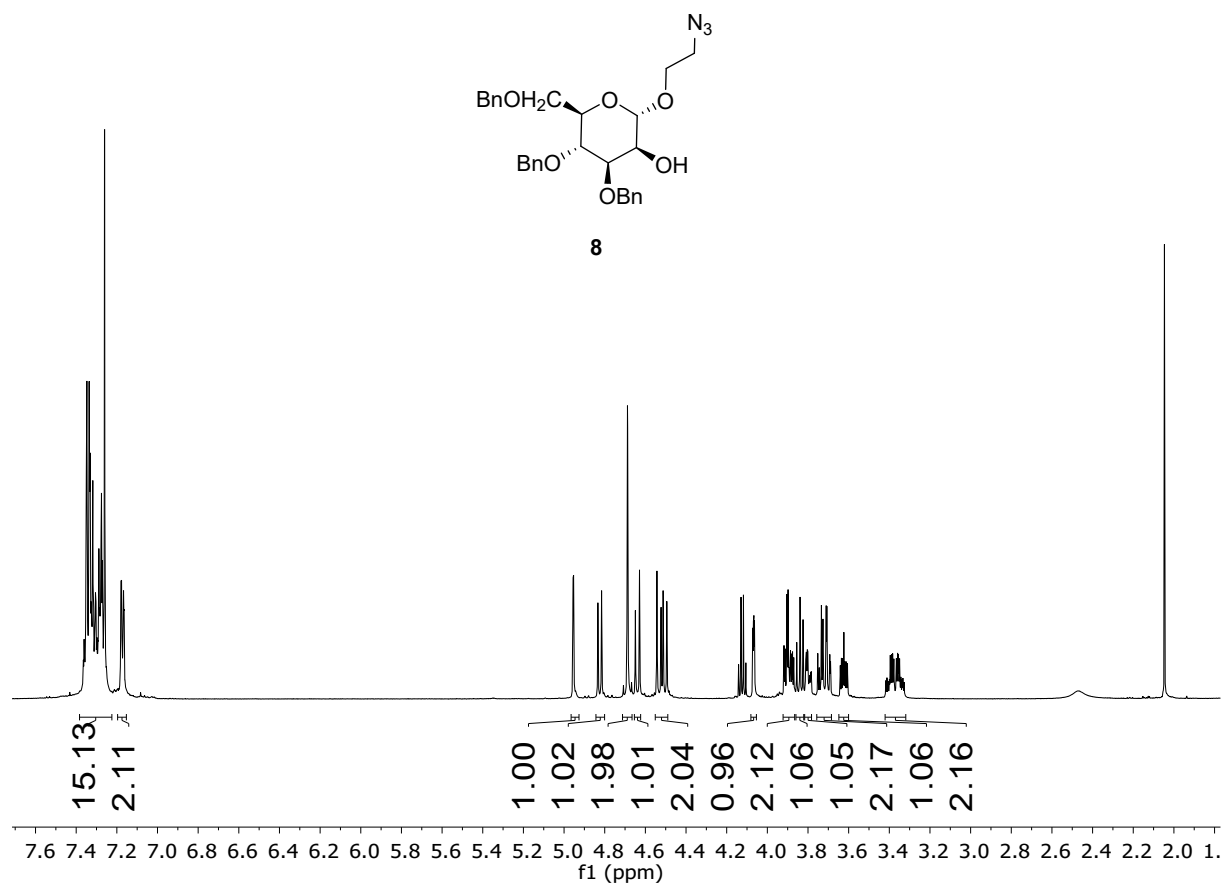

**Figure 21:**  $^1\text{H}$  NMR ( $\text{CDCl}_3$ , 600MHz) of structure **8**.

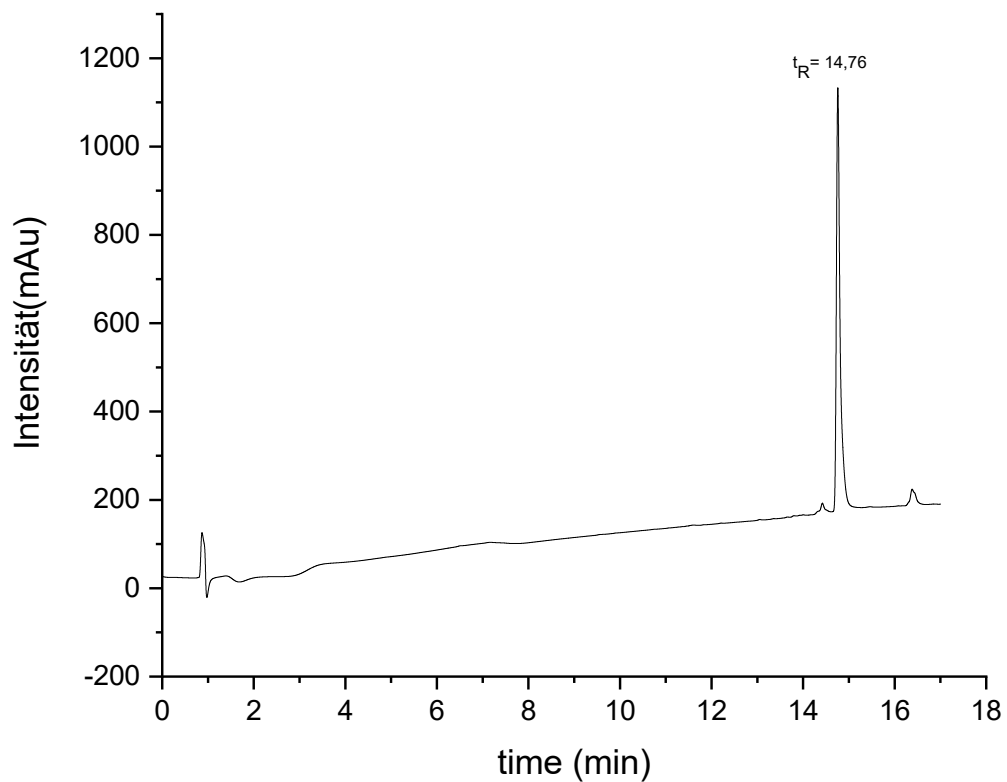

**Figure 22:** RP HPLC chromatogram (linear gradient 0-50 Vol% MeCN in H<sub>2</sub>O in 18 min at 25 °C) of structure **8**.

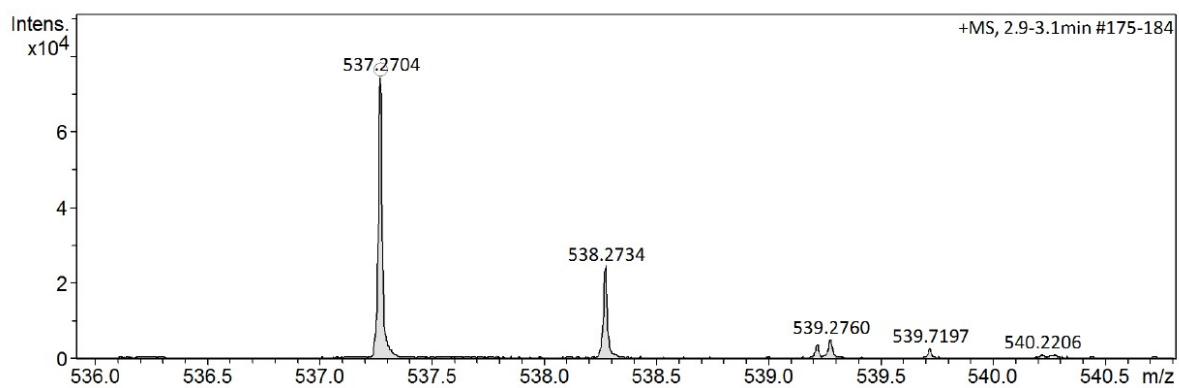

**Figure 23:** HRMS of structure **8**.

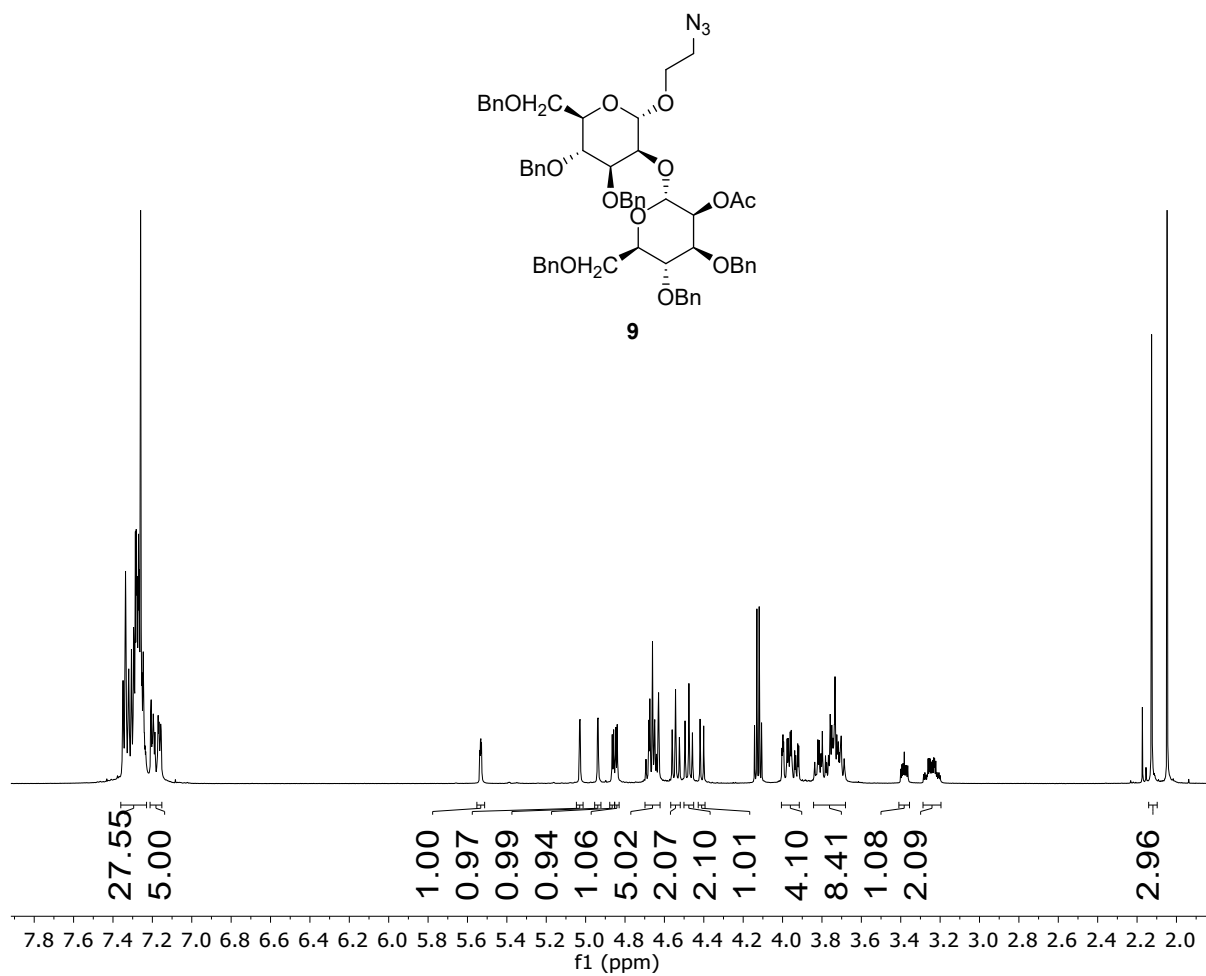

**Figure 24:** <sup>1</sup>H NMR (CDCl<sub>3</sub>, 600MHz) of structure **9**.

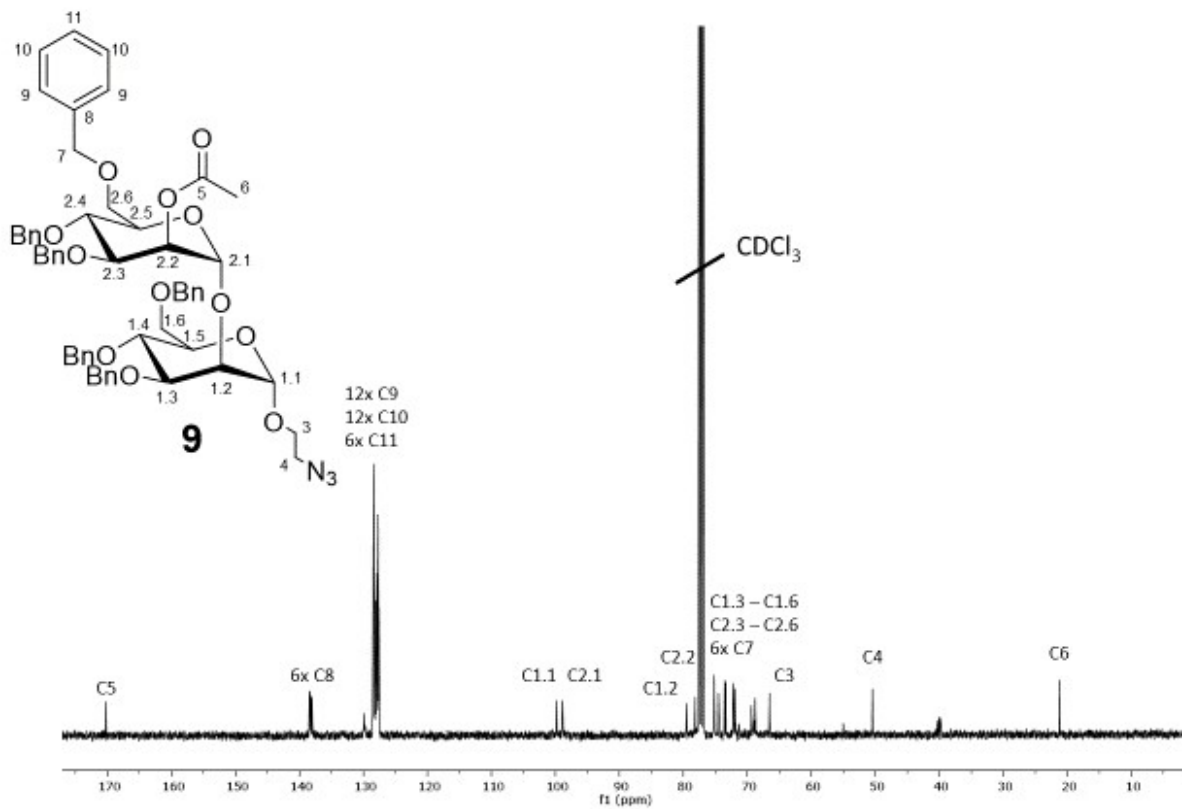

Figure 25:  $^{13}\text{C}$  NMR ( $\text{CDCl}_3$  100 MHz) of structure 9.

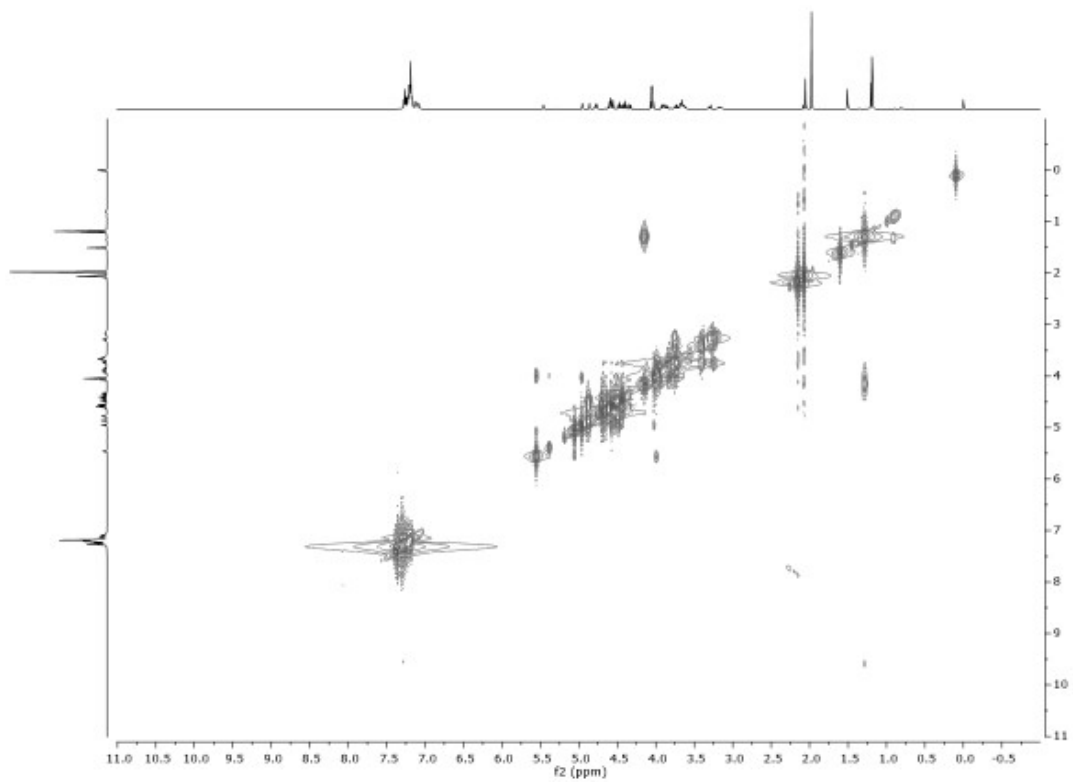

Figure 26: COSY ( $\text{CDCl}_3$  600MHz) of structure 9.



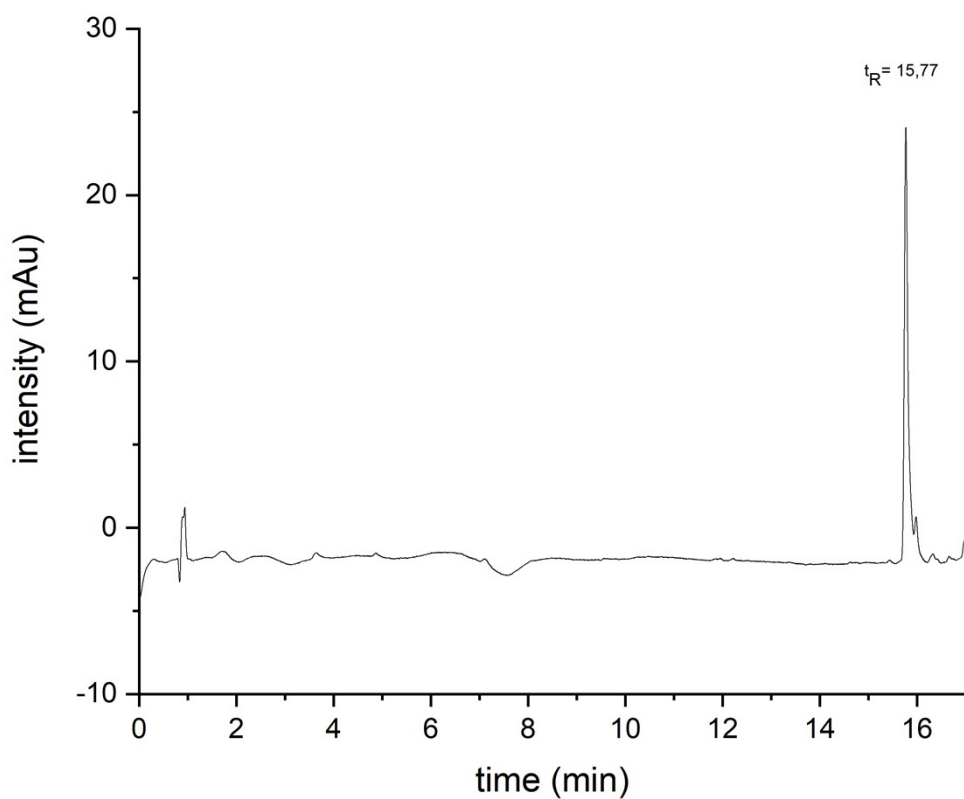

**Figure 27:** RP HPLC chromatogram (linear gradient 0-50 Vol% MeCN in H<sub>2</sub>O in 18 min at 25 °C) of structure 9.

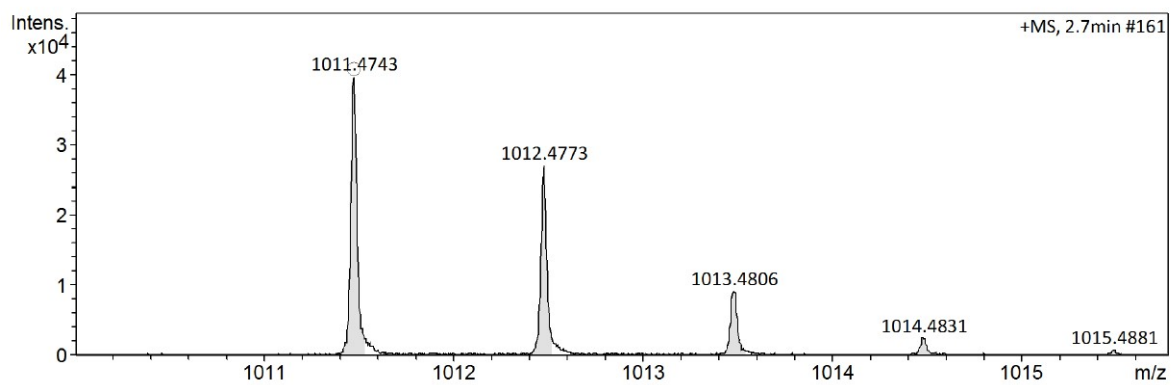

**Figure 28:** HRMS of structure 9.

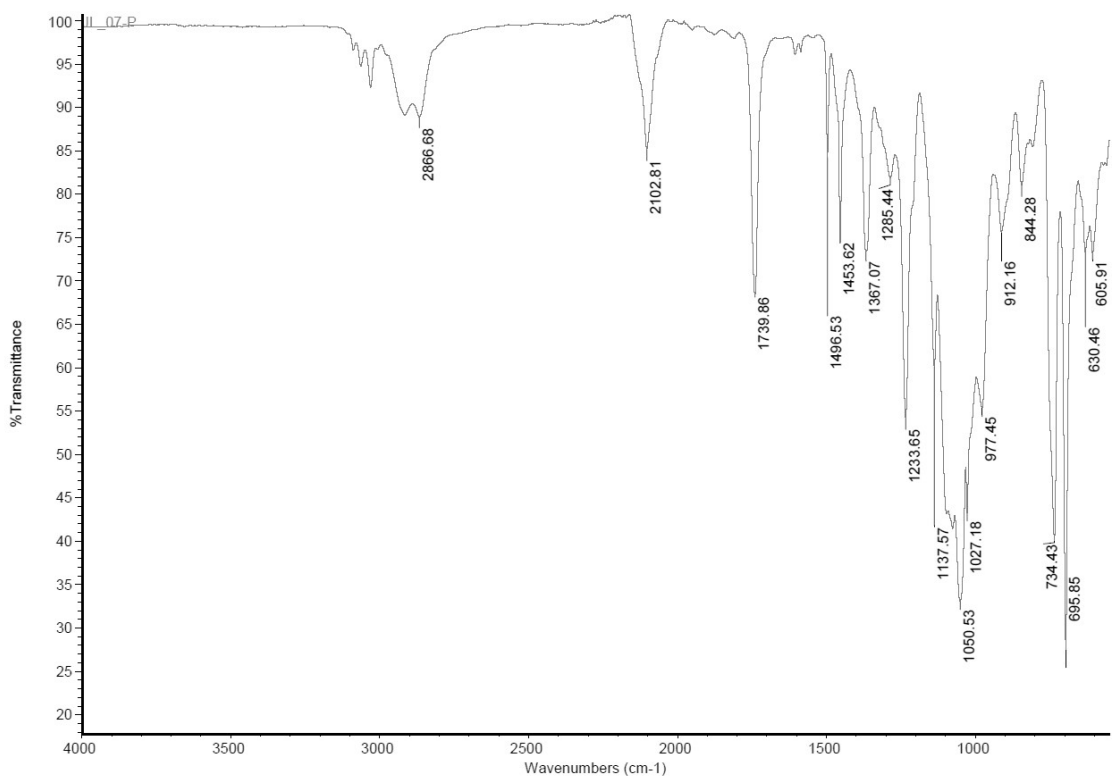

Figure 29: IR-Spectrum of structure 9.

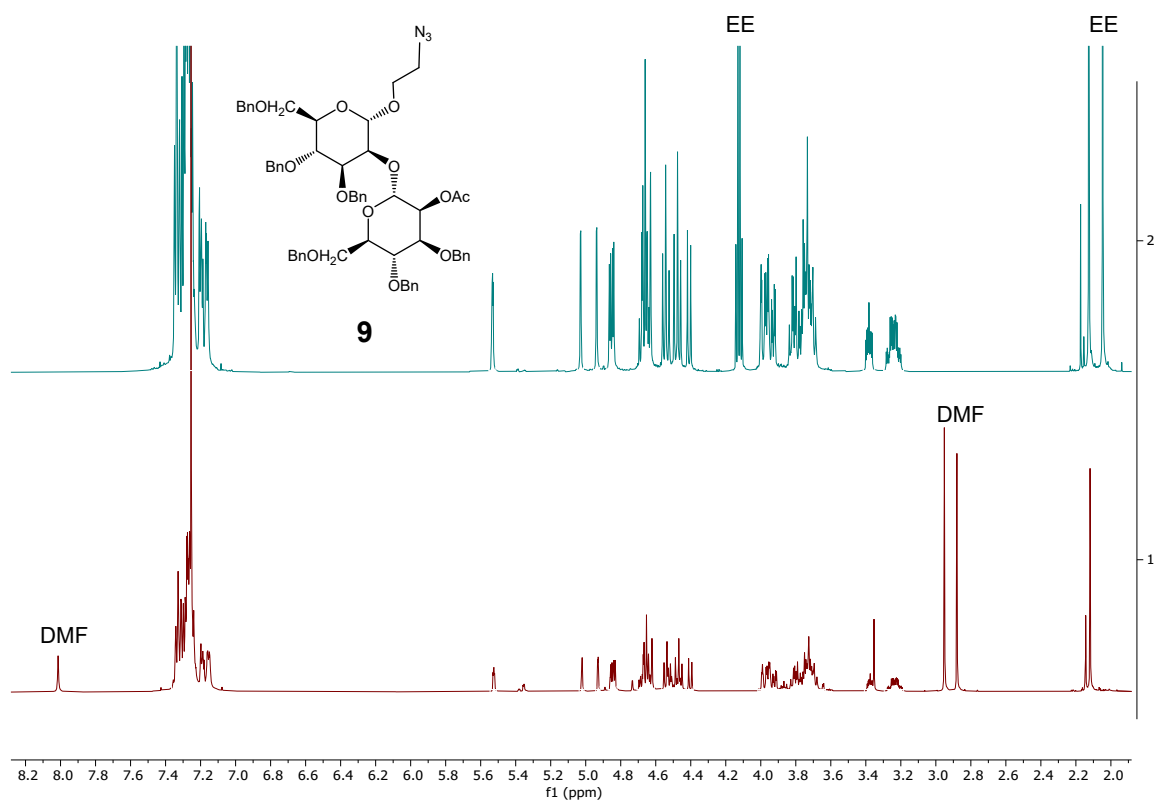

Figure 30: Comparison of the <sup>1</sup>H NMR spectra of 9 after synthesis (blue) and after recovery from the coupling solution of CuAAC (red).

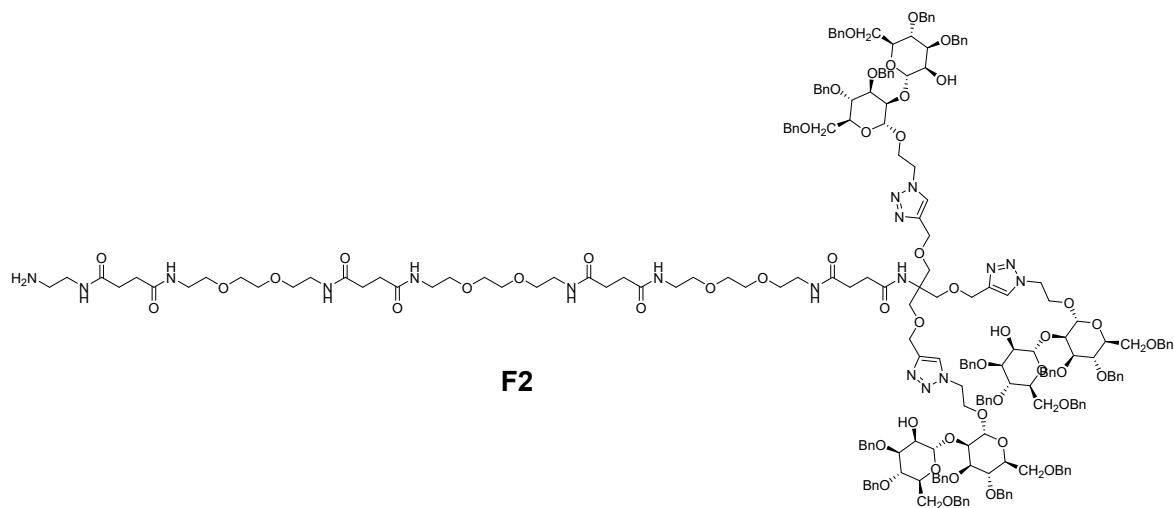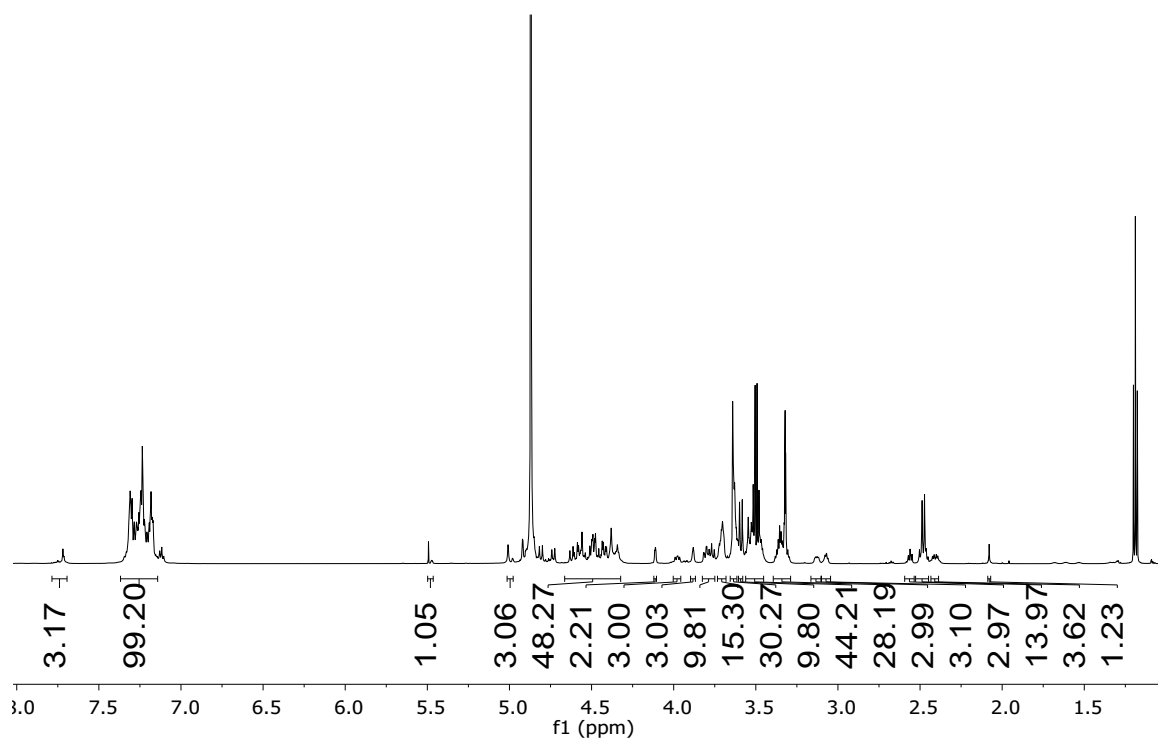

**Figure 31:**  $^1\text{H}$  NMR ( $\text{MeOH-d}_4$ , 600MHz) of structure **F2** before benzyl group deprotection.

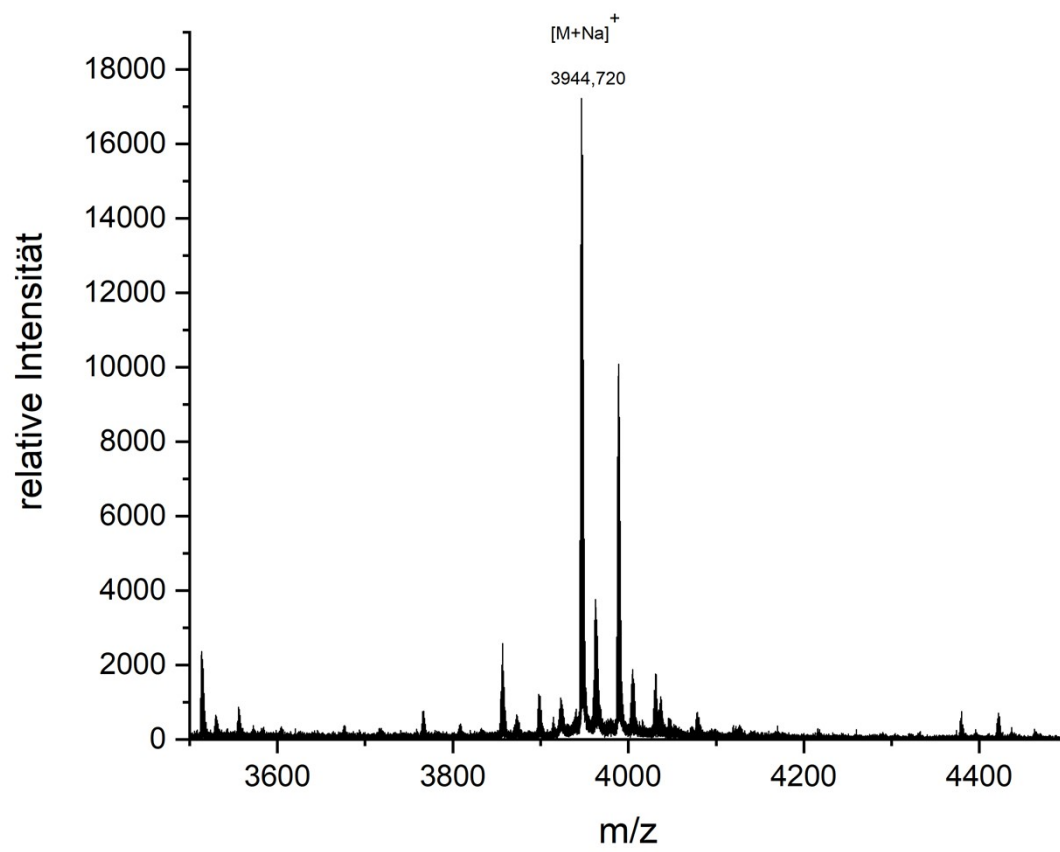

**Figure 32:** MALDI TOF MS spectrum of structure *F2* before benzyl group deprotection.

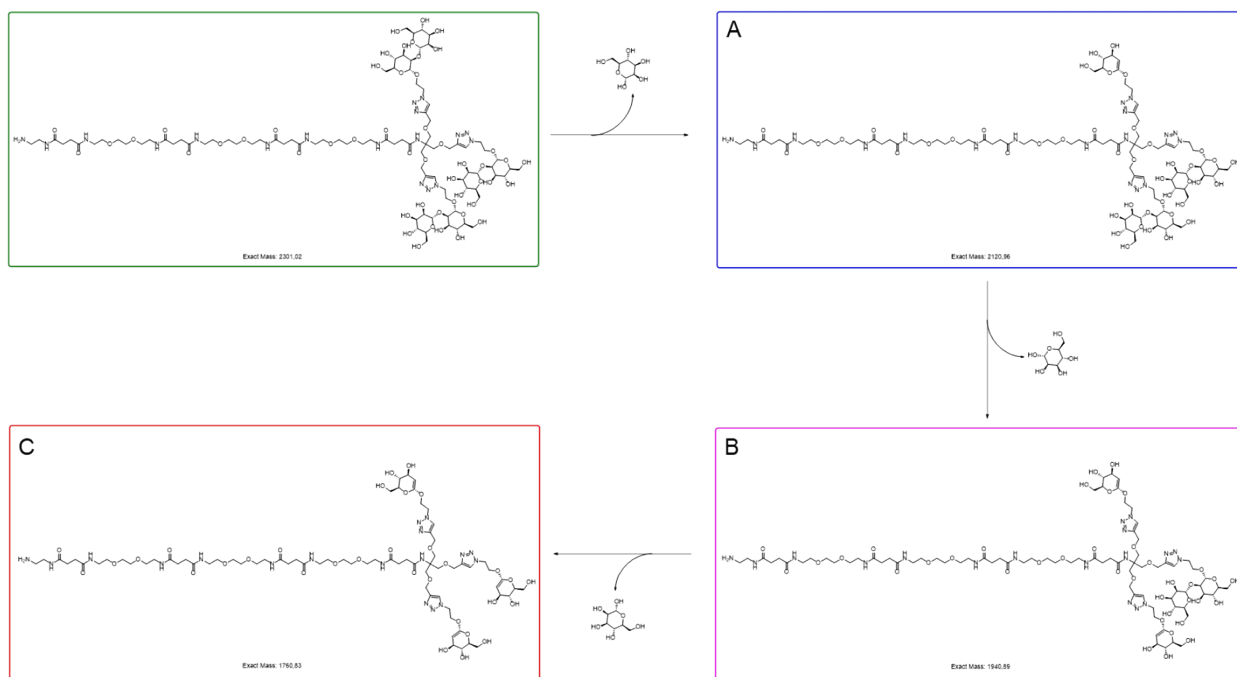

**Figure 33:** Fragmentation of F2 in HRMS measurement. (Green = no fragmentation, blue = fragmentation of one mannobiose (A), pink = fragmentation of two mannobiose (B), red = fragmentation of three mannobiose (C))

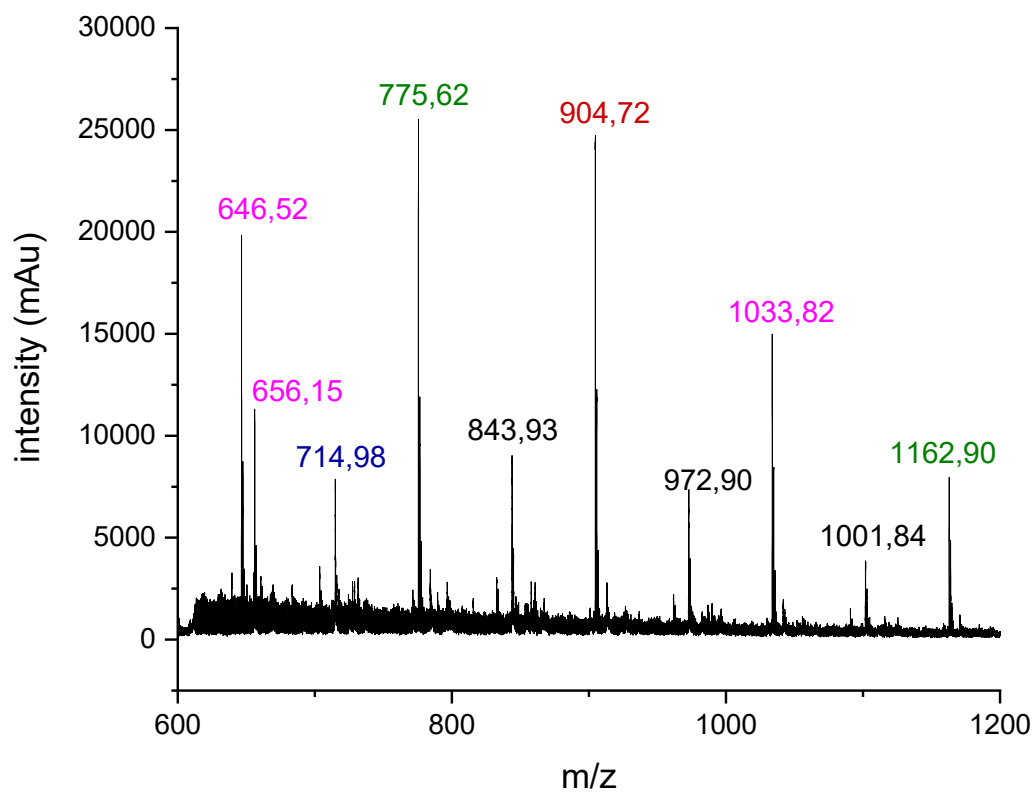

**Figure 34:** HRMS Spectrum of F2 after complete deprotection. (Green = no fragmentation, blue = fragmentation of one mannobiose, pink = fragmentation of two mannobiose, red= fragmentation of three mannobiose)

**Table 1:** Corresponding fragments and ion adducts of Figure 35

| m/z     | Fragment   | Adduct    |
|---------|------------|-----------|
| 646,52  | Fragment B | M+3H      |
| 656,15  | Fragment B | M+2H+Na   |
| 714,98  | Fragment A | M+2H+Na   |
| 775,62  | Product    | M+2H+Na   |
| 904,72  | Fragment C | M+2Na     |
| 1033,82 | Fragment B | M+3ACN+2H |
| 1162,9  | Product    | M+H+Na    |

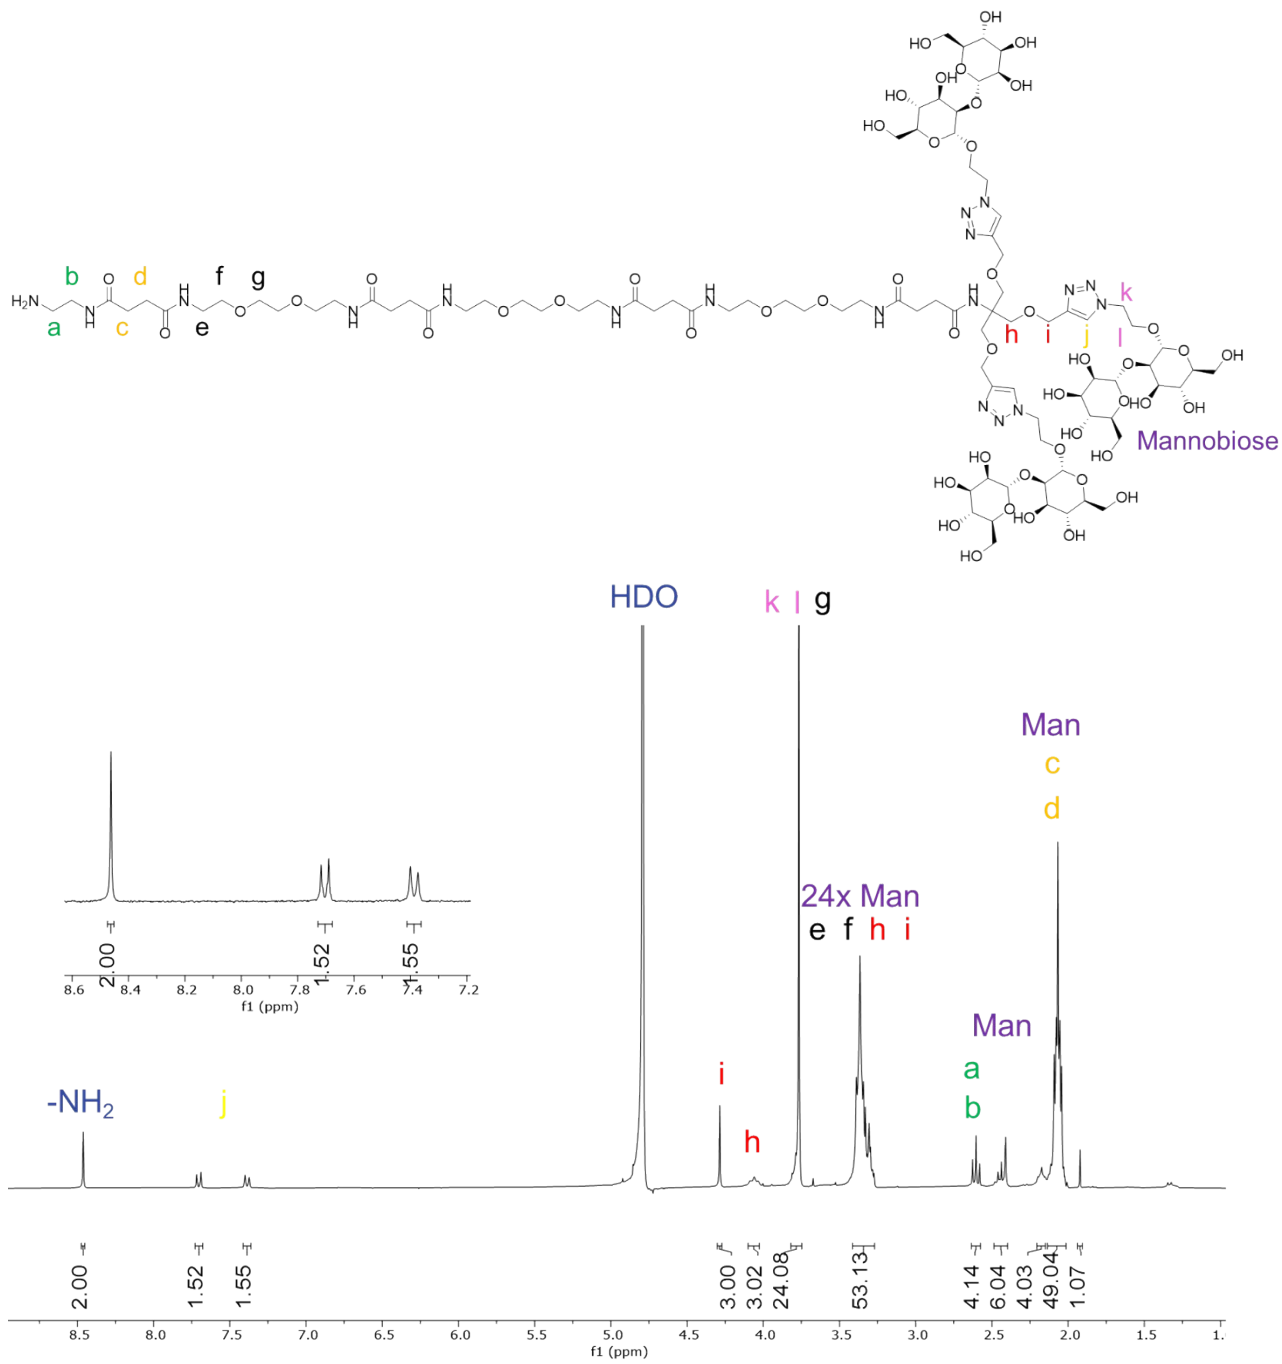

**Figure 35:**  $^1\text{H}$  NMR ( $\text{D}_2\text{O}$ , 600MHz) of **F2** after complete deprotection.
